# Supplementary material for: Sexual and reproductive health services provided by community pharmacists: a scoping review
Source: HighWire-hosted journal article supplement (doi:10.1136/bmjopen-2020-047034), 2021-07-01
Supplement: bmjopen-2020-047034supp002_data_supplement.pdf [file bmjopen-2020-047034supp002_data_supplement.pdf]

**Ovid-Medline Search Strategy**

| #  | Searches                                                                                                                 | Results <sup>a</sup> |
|----|--------------------------------------------------------------------------------------------------------------------------|----------------------|
| 1  | Pharmacists/                                                                                                             | 16225                |
| 2  | Pharmacies/                                                                                                              | 7760                 |
| 3  | Pharmaceutical Services/                                                                                                 | 8236                 |
| 4  | Community Pharmacy Services/                                                                                             | 4459                 |
| 5  | ((pharmacy* or pharmacies* or pharmacist*) and (chain* or independent or local or communit* or over-the-counter)).tw,kf. | 14447                |
| 6  | (pharmaceutical service* and communit*).tw,kf.                                                                           | 218                  |
| 7  | or/1-6 [MeSH & KEYWORDS FOR COMMUNITY PHARMACISTS]                                                                       | 36547                |
| 8  | exp sexually transmitted diseases/                                                                                       | 335793               |
| 9  | Chlamydia trachomatis/                                                                                                   | 11871                |
| 10 | Herpesvirus 2, Human/                                                                                                    | 4265                 |
| 11 | Neisseria gonorrhoeae/                                                                                                   | 9666                 |
| 12 | exp Hepatitis B/                                                                                                         | 57210                |
| 13 | Hepatitis B Virus/                                                                                                       | 26393                |
| 14 | Orthohepadnavirus/                                                                                                       | 33                   |
| 15 | exp Hepatitis C/                                                                                                         | 62836                |
| 16 | Hepacivirus/                                                                                                             | 32492                |
| 17 | exp HIV/                                                                                                                 | 97446                |
| 18 | exp HIV Infections/                                                                                                      | 277925               |
| 19 | exp Papillomavirus Infections/                                                                                           | 33521                |
| 20 | exp Papillomaviridae/                                                                                                    | 32057                |
| 21 | Papillomavirus vaccines/                                                                                                 | 7413                 |
| 22 | exp Syphilis/                                                                                                            | 27507                |
| 23 | Treponema pallidum/                                                                                                      | 4000                 |
| 24 | Sexual Behavior/                                                                                                         | 55085                |
| 25 | Sexual Health/                                                                                                           | 782                  |
| 26 | Safe Sex/                                                                                                                | 3119                 |
| 27 | Unsafe sex/                                                                                                              | 4714                 |
| 28 | exp Contraception/                                                                                                       | 26466                |
| 29 | exp Contraceptive devices/                                                                                               | 24933                |
| 30 | exp Contraceptive agents/                                                                                                | 69566                |
| 31 | exp vaccines, contraceptive/                                                                                             | 329                  |
| 32 | Levonorgestrel/                                                                                                          | 4191                 |
| 33 | Pregnancy/                                                                                                               | 863382               |

|    |                                                                                                  |        |
|----|--------------------------------------------------------------------------------------------------|--------|
| 34 | Pregnancy complications/dt                                                                       | 7819   |
| 35 | Pregnancy Tests/                                                                                 | 3718   |
| 36 | exp Infertility/                                                                                 | 64867  |
| 37 | exp Fertility agents/                                                                            | 29256  |
| 38 | Maternal health/                                                                                 | 1251   |
| 39 | exp "Sexual and Gender Minorities"/                                                              | 5443   |
| 40 | exp Hormone replacement therapy/                                                                 | 24562  |
| 41 | exp Sexual Dysfunctions, Psychological/                                                          | 26248  |
| 42 | exp Sexual Dysfunction, Physiological/                                                           | 29546  |
| 43 | exp Abortion, induced/                                                                           | 39776  |
| 44 | exp Reproductive Health Services/                                                                | 39030  |
| 45 | Reproductive Health/                                                                             | 3131   |
| 46 | exp Breast feeding/                                                                              | 36872  |
| 47 | (sexually-transmitted disease* or sexually-transmitted infection* or STD* or STI or STIs).tw,kf. | 42118  |
| 48 | Chancroid.tw,kf.                                                                                 | 943    |
| 49 | Chlamydia.tw,kf.                                                                                 | 24805  |
| 50 | condyloma*.tw,kf.                                                                                | 4398   |
| 51 | genital herpes*.tw,kf.                                                                           | 3117   |
| 52 | genital wart*.tw,kf.                                                                             | 2463   |
| 53 | gonorrhoea.tw,kf.                                                                                | 7860   |
| 54 | hepatitis B.tw,kf.                                                                               | 77251  |
| 55 | hepatitis C.tw,kf.                                                                               | 76235  |
| 56 | (HIV* or human immunodeficiency virus*).tw,kf.                                                   | 328780 |
| 57 | (lymphogranuloma or LGV).tw,kf.                                                                  | 2246   |
| 58 | papillomavirus.tw,kf.                                                                            | 36834  |
| 59 | syphilis.tw,kf.                                                                                  | 28351  |
| 60 | trichomon*.tw,kf.                                                                                | 9650   |
| 61 | family planning.tw,kf.                                                                           | 40781  |
| 62 | (contracept* or birth* control*).tw,kf.                                                          | 74693  |
| 63 | condom*.tw,kf.                                                                                   | 21267  |
| 64 | diaphragm*.tw,kf.                                                                                | 46194  |
| 65 | cervical cap*.tw,kf.                                                                             | 269    |
| 66 | vaginal ring*.tw,kf.                                                                             | 1002   |
| 67 | (intrauterine device* or intra-uterine-device* or IUD*).tw,kf.                                   | 12064  |
| 68 | ((male or female) adj2 steril*).tw,kf.                                                           | 11679  |

|     |                                                               |         |
|-----|---------------------------------------------------------------|---------|
| 69  | Gardasil.tw,kf.                                               | 480     |
| 70  | Plan B.tw,kf.                                                 | 251     |
| 71  | pregnan*.tw,kf.                                               | 512065  |
| 72  | infertil*.tw,kf.                                              | 61090   |
| 73  | fertil*.tw,kf.                                                | 177105  |
| 74  | (transgender* or (trans adj2 gender*)).tw,kf.                 | 5726    |
| 75  | (Sexual adj2 (dysfunction* or function*)).tw,kf.              | 21698   |
| 76  | abortion*.tw,kf.                                              | 61414   |
| 77  | sexual health.tw,kf.                                          | 9632    |
| 78  | reproductive health.tw,kf.                                    | 14294   |
| 79  | ((maternal or perinatal or reproductive) adj2 health).tw,kf.  | 27309   |
| 80  | (breast feeding* or breastfeeding* or breast-feeding*).tw,kf. | 37455   |
| 81  | or/8-80 [MeSH & KEYWORDS FOR SRH AREAS]                       | 2092365 |
| 82  | Professional Role/                                            | 13339   |
| 83  | Professional Competence/                                      | 24048   |
| 84  | Directive Counseling/                                         | 2308    |
| 85  | Education, Pharmacy/                                          | 5809    |
| 86  | Health Promotion/                                             | 72141   |
| 87  | Family Planning Services/                                     | 24586   |
| 88  | exp Maternal Health Services/                                 | 47925   |
| 89  | Mass Screening/                                               | 101027  |
| 90  | Patient Education as Topic/                                   | 83962   |
| 91  | "Referral and Consultation"/                                  | 65092   |
| 92  | Prescriptions/                                                | 3262    |
| 93  | Electronic Prescribing/                                       | 996     |
| 94  | exp Injections/                                               | 280915  |
| 95  | exp vaccination/                                              | 82802   |
| 96  | immunization/                                                 | 50252   |
| 97  | testing*.tw,kf.                                               | 533813  |
| 98  | screening*.tw,kf.                                             | 515787  |
| 99  | prescrib*.tw,kf.                                              | 142441  |
| 100 | dispens*.tw,kf.                                               | 37224   |
| 101 | (advice or advise or counseling or counselling).tw,kf.        | 143589  |
| 102 | guidance.tw,kf.                                               | 108845  |
| 103 | educat*.tw,kf.                                                | 594160  |
| 104 | instruct*.tw,kf.                                              | 92660   |

|     |                                                         |         |
|-----|---------------------------------------------------------|---------|
| 105 | consult*.tw,kf.                                         | 123408  |
| 106 | refer*.tw,kf.                                           | 803410  |
| 107 | program*.tw,kf.                                         | 860715  |
| 108 | service*.tw,kf.                                         | 510381  |
| 109 | (partner* adj2 therap*).tw,kf.                          | 441     |
| 110 | (partner* adj2 notif*).tw,kf.                           | 1030    |
| 111 | or/82-110 [MeSH & KEYWORDS FOR SRH ACTIVITIES/PROGRAMS] | 4104910 |
| 112 | 7 and 81 and 111 [PHARMACISTS' ROLES IN SRH AREAS]      | 1775    |
| 113 | limit 112 to yr="2007 -Current"                         | 1160    |

<sup>a</sup> Run Date: July 22, 2020
